# Supplementary material for: Bivalent Impact of Social Networks on Overarming: Model-Based Insights on the Alignment between Social and Individual Interests
Source: Research Square preprint supplement (doi:10.21203/rs.3.rs-3487266/v1), 2025-09-26
Supplement: Supplementary file 2 [file b0cb54f163f6f3e122657044.pdf]

# Supplemental Information for “Bivalent Impact of Social Networks on Overarming: Model-Based Insights on the Alignment between Social and Individual Interests”

Feng Fu<sup>1,2</sup>

Michael Herron<sup>3</sup>

Daniel Rockmore<sup>1,4</sup>

<sup>1</sup>Department of Mathematics, Dartmouth College, Hanover, NH 03755, USA

<sup>2</sup>Department of Biomedical Data Science, Geisel School of Medicine at  
Dartmouth, Lebanon, NH 03756, USA

<sup>3</sup>Program in Quantitative Social Science, Dartmouth College, Hanover, NH  
03755, USA

<sup>4</sup>The Santa Fe Institute, Santa Fe, NM 87501, USA

## 1 Quantifying network structural effect on arming choices

As opposed to well-mixed populations, the presence of spatial population structure, and social network structure in general, renders a double-edged sword effect on individual decisions regarding gun ownership. That is, the critical  $p_a$  above which gun acquisitions are non-zero in structured populations is greater than that in well-mixed populations. Moreover, overarming is greatly exacerbated in the former than in the latter for larger  $p_a$  values. To shed analytical insight into this nontrivial phenomenon, we focus on the local clustering arising spatial populations. Another important characteristic of network populations is degree heterogeneity, which we will analyze separately.

Using the method of pair approximation, we are able to calculate the local clustering (or assortment) analytically in the limiting case of weak selection  $K \gg 1$ . In this case, the local densities, for example,  $q_{A|A}$  (the conditional probability of an  $A$  individual finding another  $A$  in its direct neighborhood), reach equilibrium values much faster than the global density of  $A$ , denote by  $x$ . Using the technique of timescale separation and solving the dynamics along slow and fast manifolds respectively, we obtain:

$$q_{A|A} = x + \frac{1}{k-1}(1-x), \quad (1)$$

$$q_{B|B} = 1 - \frac{k-2}{k-1}x. \quad (2)$$

Considering the strategy updating along the boundary between  $A$  and  $B$  individuals, we focus on a randomly chosen  $AB$  pair in the population. For this  $A$  individual, its expected

payoff  $g_1(x)$  is

$$g_1(x) = b_g - c_g + \frac{p_a}{k} [\delta_e + (k-1)((-1)q_{A|A} + \delta_e q_{A|A})] . \quad (3)$$

Similarly, the expected payoff for the  $B$  individual is given by

$$g_0(x) = \frac{p_a}{k} [-\delta_e + (k-1)((-\delta_e)q_{A|B} - \delta_n q_{B|B})] . \quad (4)$$

In order for  $A$  individuals to emerge in the population, we need the condition  $g_1(0) > g_0(0)$ . Therefore we obtain the threshold  $p_a$  required for  $A$  strategy to emerge in the population when initially rare:

$$p_a > \frac{k(c_g - b_g)}{(k-1)\delta_n + k\delta_e - 1} \quad (5)$$

By solving  $g_1(x) = g_0(x)$ , we obtain the equilibrium fraction of gun acquisition in spatial populations under the weak selection limit:

$$x^* = \begin{cases} 0, & p_a \leq \frac{k(c_g - b_g)}{(k-1)\delta_n + k\delta_e - 1} \\ \frac{-p_a(\delta_n + \delta_s) + k[b_g - c_g + p_a(\delta_n + \delta_e)]}{(k-2)p_a(\delta_n + \delta_s)}, & p_a > \frac{k(c_g - b_g)}{(k-1)\delta_n + k\delta_e - 1} \end{cases} \quad (6)$$

## 1.1 Payoff structure condition for double-edged sword effect: the fear of being confronted with gun owners

As pointed out before, both the payoff value  $\delta_e$  and the relative rate of provocation  $p_a$  impact the severity of the social dilemma of overarming. Because of clustering (kind-meets-kind) in spatial populations, the effective social payoff for gun interactions (the effective  $\delta_e$  value) is shifted as in the following:

$$\begin{pmatrix} -\delta_s & \delta_e \\ -\delta_e & -\delta_n \end{pmatrix} \longrightarrow \begin{pmatrix} -\delta_s & \delta_e + \frac{2\delta_e - \delta_s + \delta_n}{k-2} \\ -\delta_e - \frac{2\delta_e - \delta_s + \delta_n}{k-2} & -\delta_n \end{pmatrix}$$

Clearly, the payoff structure condition for spatial structure to aggravate the social dilemma of overarming possibly at all as opposed to well-mixed scenarios if and only if  $\delta_e > \frac{1}{2}(\delta_s - \delta_n)$ .

For the same reason, the individual (nonsocial) payoff matrix for arming decisions is

$$\begin{pmatrix} b_g - c_g & b_g - c_g \\ 0 & 0 \end{pmatrix} \longrightarrow \begin{pmatrix} b_g - c_g & b_g - c_g + \frac{2(b_g - c_g)}{k-2} \\ -\frac{2(b_g - c_g)}{k-2} & 0 \end{pmatrix}$$

Furthermore, in order to allow the crossover of the two equilibrium curves from well-mixed and spatial populations respectively, we obtain the overall payoff structure condition:

$$\delta_e > c_g - b_g + \frac{1}{2}(\delta_s - \delta_n). \quad (7)$$

More generally, in agent-based simulations, the critical values  $\delta_e$  will be smaller than this theoretical prediction for two reasons. First, this prediction is obtained under the

limit of weak selection and non-weak selection will lead to higher equilibrium fraction of  $A$  individuals. Second, the method of pair approximation underestimates the population equilibrium of  $A$  individuals.

Under this condition, spatial structure exhibits a double-edged sword effect on gun acquisitions, depending on the relative provocation rate  $p_a$ . The critical value  $p_a^*$  is given by

$$p_a^* = \frac{2(c_g - b_g)}{2\delta_e - (\delta_s - \delta_n)} \leq 1. \quad (8)$$

For  $p_a < p_a^*$ , spatial structure actually inhibits gun acquisitions as compared to well-mixed populations, whereas for  $p_a > p_a^*$ , spatial structure promotes gun acquisitions, thereby leading to greater extent of overarming.

Another interesting condition for spatial structure to completely inhibit  $A$  is

$$\delta_e < c_g - b_g + \frac{\delta_s - (k - 1)\delta_n}{k}. \quad (9)$$

If this condition holds, spatial structure is always a suppressor of gun acquisitions. There is no way for gun acquisitions to unfold in spatial populations. This theoretical result has significant real-world implications for gun control.

## 1.2 Understanding the impact of network degree heterogeneity: dynamics on star graphs under strong selection

Although it is possible to study the invasion and fixation dynamics of individual arming choices on graphs/networks using an explicit Markov chain approach with absorbing states, the numerical calculation becomes impractical especially for large network sizes. Nevertheless, to understand the impact of network heterogeneity on overarming, we can instead focus on graphs that are simple yet still capture the essence of the topological features including degree heterogeneity and clustering.

Recall that the gun acquisition dynamics on the gang and campus networks exhibit qualitatively different behavior than the village network: that is, there exists a sharp transition from zero to complete gun acquisitions as the relative provocation rate  $p_a$  increases. The gang and campus networks resemble “star-like” graphs. Thus, let us simulate the same game dynamics of gun acquisitions on star graphs (zero clustering), wheel graphs (leaf nodes connected via a cycle, leading to some level of clustering), double stars, and double wheels (see Fig. S3). We find that the network heterogeneity in these simple examples greatly exacerbates overarming and moreover, the presence of local clustering (wheels and double wheels, as we have explained the analytical insights for degree regular graphs such as spatial populations) can inhibit the emergence of gun acquisitions for small  $p_a$ , leading to similar results we have observed in the degree-heterogeneous model networks. The real gang and campus networks have “star-like” motifs that share similarity with wheels and double wheels, whereas the model degree-heterogeneous network and the real village network share topological similarity and therefore they lead to qualitatively same dynamics of gun acquisition.

The star graphs allow mathematical tractability and provide further analytical intuitions for understanding our agent-based simulation results on social networks. In our simulations,

we use synchronous updating where every individual updates their arming choices based on the Fermi function at each time step (also known as the pairwise comparison rule [? ]). In general, synchronous updating leads to qualitatively the same results as asynchronous updating in which each individual updates their strategy in a random sequential manner. However, noticeable difference can arise under certain conditions such as strong selection. Under this limit, individuals only adopts the strategy of a randomly chosen neighbor only if the neighbor has a higher payoff than themselves.

Specifically, we consider the way in which gun acquisitions (denoted by  $A$ ) spread in a star network that has zero gun acquisitions initially (denoted by  $B$ ). Despite being much more complicated, the case of wheels can be analyzed analogously and leads to additional insights about clustering besides heterogeneity. The fixation probability of a single  $A$ , starting on the periphery or the center, can be calculated in closed form for star graphs. On the other hand, the conditional fixation time can be exponential, making it impossible to witness fixation in simulations for non-weak selection. Furthermore, we show that the stochastic dynamics become semi-deterministic under the limit of strong selection ( $K \rightarrow 0$ ), and that reaching fixation is not always possible. In fact, under certain conditions the star network can enter into one of the two possible configurations that the system alternates between: the center probabilistically alternates between  $A$  and  $B$  while all the leaf nodes are “frozen” in their states and thus maintain a fixed proportion of  $A$  and  $B$ .

Consider a star graph of size  $n + 1$  (the number of leaf nodes is  $n$ ) and asynchronous updating of strategies in the limit of strong selection. As noted above, synchronous updating leads to instantaneous fixation as soon as the center adopts  $A$  and has a higher payoff than leaf nodes. For this reason, we focus on asynchronous updating, which leads to more interesting dynamic behavior.

If an  $A$  appears on one of the leaf nodes, this  $A$  first needs to take over the center  $B$  in order to spread to other leaf nodes. The expected payoff of the center  $B$  against 1  $A$  and  $(n - 1)$   $B$ 's in its neighborhood is

$$g_0^H(1) = p_a(-(n - 1)\delta_n - \delta_e)/n, \quad (10)$$

while the expected payoff of the leaf node  $A$  against a center  $B$  is

$$g_1^L(B) = b_g - c_g + p_a(\delta_e), \quad (11)$$

Thus it requires  $g_1^L(B) > g_0^H(1)$ , which leads to a condition formally similar to well-mixed populations for large  $n$ :

$$p_a > \frac{n(c_g - b_g)}{(n + 1)\delta_e + (n - 1)\delta_n}. \quad (12)$$

If an  $A$  appears on the center initially, its expected payoff,  $b_g - c_g + p_a\delta_e$ , must be greater than those leaf nodes  $B$ 's,  $-p_a\delta_e$ , thereby leading to the condition

$$p_a > \frac{c_g - b_g}{2\delta_e}. \quad (13)$$

Because of the nature of negative interactions, the center  $A$ 's payoff is strictly decreasing with the number of  $A$ 's, denoted by  $i$ , in its neighborhood. Meanwhile, given the center is an

$A$ , the expected payoff of a periphery  $B$ ,  $g_0^L(A) = -p_a\delta_e$ , is greater than that of a periphery  $A$ ,  $g_1^L(A) = b_g - c_g - p_a\delta_s$ , because  $b_g - c_g < 0$  and  $\delta_s > \delta_e$ . Thus, regardless of whether the star graph starts with a single  $A$  at its center or at one of the periphery nodes, the center must adopt and remain as  $A$  in order for  $A$ 's to propagate through the star graph. However, such propagation of  $A$ 's in the star network will stall after the number of  $A$ 's  $i$  reaches a critical threshold  $i^*$  at which the center  $A$ 's expected payoff  $g_1^H(i) = b_g - c_g + p_a[-i\delta_s + (n - i)\delta_e]/n$  is less than any periphery  $B$ 's,  $g_0^L(A) = -p_a\delta_e$ . This condition leads to

$$i > \frac{n(2p_a\delta_e + b_g - c_g)}{p_a(\delta_s + \delta_e)} = i_c^A \quad (14)$$

When the number of  $A$  reaches  $\lfloor i_c^A \rfloor + 1$ , the center  $A$  will turn into a  $B$  with probability  $[n - (\lfloor i_c^A \rfloor + 1)]/n$  since it has smaller expected payoff than any periphery  $B$ . Once the center turns into  $B$ , it needs to be taken over by  $A$  again, or else the number of  $A$ 's will drop in the star network as the center  $B$  can take over periphery  $A$ 's as long as it has higher payoff than  $A$ . This could lead to an amplifying effect on the demise of  $A$ 's, since a center  $B$ 's expected payoff strictly increases as the number of periphery  $A$ 's decreases. As such, we obtain another critical threshold  $i_c^B$  for the number of  $A$ 's in the periphery:

$$g_1^L(B) = b_g - c_g + p_a\delta_e > g_0^H(i) = p_a(-i\delta_e - (n - i)\delta_n)/n \quad (15)$$

We have

$$i > \frac{n[c_g - b_g - p_a(\delta_e + \delta_n)]}{p_a(\delta_e - \delta_n)} = i_c^B \quad (16)$$

When both conditions are satisfied, the states of periphery nodes are frozen (the number of periphery  $A$ 's is given by  $\lfloor i_c^A \rfloor + 1$ ) whereas the center node alternates between  $A$  and  $B$  probabilistically (see a simulation result in Fig. S4).

Figure S5 depicts the regions of model parameters in which the final state the system will approach, depending on whether the center is started with  $A$  or  $B$ . If the center of the star graph starts with  $A$ , the most interesting region is that the system can initially increase with  $A$  due to propagation of  $A$  from the center to periphery nodes but once the number of  $A$ 's in the leaf nodes exceeds a critical threshold that the center  $A$  has a smaller payoff than a periphery  $B$ , it quickly leads to the demise of all  $A$ 's. If the center of the star graph starts with  $B$ , the most interesting region is the bistability region: only when the initial number of  $A$ 's in the leaf nodes exceeds a critical threshold,  $A$ 's are able to sustain themselves in the population. In both cases, the population either has zero gun acquisitions or end up with a mix of  $A$  and  $B$  where the center alternates between  $A$  and  $B$  while leaf nodes are fixed in their proportion of  $A$  and  $B$ . Note that the equilibrium fraction of gun acquisitions on star graphs is greater than in well-mixed populations (Fig. S4).

## 2 Community gathering: more guns, more gun-related incidences

In certain settings, interactions extend beyond one-on-one engagements and involve groups of individuals. These group gatherings commonly occur in locations such as schools, shopping centers, churches, and public demonstrations or protests. With the rise in gun ownership, the likelihood of firearms being present at these events also increases. In this analysis, we conduct a straightforward calculation that illustrates how the inevitability of human error leads to a rise in gun-related incidents as the presence of firearms grows. Although our calculations employ a simplified probabilistic approach, they provide valuable insights that challenge the misconception that “more guns lead to a safer community.”

**The risk of everyday gun-related incidence for gathering size  $G$**  Let  $\epsilon$  denote the error probability that an armed individual causes a gun-related incidence, and let  $p$  denote the probability that an individual participating in community gatherings is armed. Then the expected loss for a gathering of  $G$  individuals, expressed as the occurrence likelihood of at least one error:

$$\sum_j \binom{G}{j} p^j (1-p)^{G-j} (1 - (1-\epsilon)^j) \quad (17)$$

$$= 1 - ((1-\epsilon)p + (1-p))^G \quad (18)$$

$$= 1 - (1-p\epsilon)^G \quad (19)$$

Therefore, the risk of gun-related incidence increases monotonically with the arming probability  $p$  and the error probability  $\epsilon$ , and for large gathering sizes  $G \gg 1$ , this risk becomes almost certain except for zero gun possessions ( $p = 0$ ) or carrying free of human errors ( $\epsilon = 0$ ).

**Narrow margin to enable beneficial outcomes for “good guys with guns” scenario** Suppose some fraction  $c$  of the population are criminals, and the remaining fraction  $1 - c$  are citizens. We assume that a fraction  $p$  of the population is armed all the time. Any armed person makes harmful mistakes (errors) with probability  $\epsilon$  (per day carry).

Let  $G$  be the size of a community gathering, and let us assume a random assortment of citizens so that  $pG$  are armed and  $(1-p)G$  are unarmed.

The likelihood  $A_0$  of an everyday scenario of gatherings with citizens only is

$$A_0 = \binom{G}{0} c^0 (1-c)^G = (1-c)^G.$$

The likelihood  $A_1$  of a “threat” scenario of gatherings of citizens but mixed with a single criminal is

$$A_1 = \binom{G}{1} c^1 (1-c)^{G-1} = Gc(1-c)^{G-1}.$$

The expected loss for everyday scenario among armed citizens (the cost of carrying firearms) is  $C(G, p, \epsilon) = 1 - (1 - p\epsilon)^G$ .

The expected probability of successful deterrence (the benefit of carrying firearms) in a threat scenario which occurs in relative frequency  $K_0 = A_1/A_0$  to everyday scenarios:

$$B(G, p, \epsilon) = K_0 \cdot \sum_j \binom{G-1}{j} p^j (1-p)^{G-1-j} (1-\epsilon^j) = K_0 (1 - (p\epsilon + 1 - p)^{G-1})$$

which monotonically decreases with  $\epsilon$ . For a wide range of parameters, there exists only a very narrow margin of human error  $\epsilon$  to ensure net beneficial outcomes for “good guys with guns” scenario, i.e.,  $B(G, p, \epsilon) > C(G, p, \epsilon)$ .

### 3 Model extensions

#### 3.1 Impact of small, targeted network changes on gun ownership

As mentioned above, social network structure impacts gun acquisition. Certain network structures, like star graphs, strongly amplify gun acquisition, whereas others, like wheels, have a lesser impact. While our approach can be used to study any given network topology and assess its impact on gun acquisition as an amplifier vs suppressor, we focus specifically on how small changes in the network can have big impacts. This question has practical implications for social interventions aimed at reducing overarming.

Without loss of generality, we demonstrate the impact of adding a single edge between a pair of nodes with the largest path length in the real campus and village networks, respectively (as shown in Fig. 3 of the main text; also Fig. S6 and S7). In the campus network, the added link in Fig. S6b the previously two leaf nodes are now joined by the new added link, forming a large cycle. Despite this small change, the impact on gun acquisition is pronounced: it increases the threshold of  $p_a$ , above which the population abruptly transitions from zero to full acquisition especially with lower gun acquisition rates most clearly seen in the transition. The intuition is that joining two distant leaf nodes, each from a local star motif, weakens the relative advantages of the local hubs they are connected to due to their increased connectivity (also see Fig. S2) and therefore leads to a lower inclination to gun acquisition. For this reason, we also see similar difference between wheel and star graphs (Fig. S3). Furthermore, we confirm a comparable noticeable impact of small, targeted network changes in the real village network, as shown in Fig. S7, albeit less pronounced compared to Fig. S6 (since the latter network is not as strong an amplifier of gun acquisition as the former, see Fig. 3 in the main text). Taken together, these results lend support for optimizing social network interventions via “graph surgery,” which only needs small changes in the network but can yield significant impact as desired.

#### 3.2 Group interactions beyond pairwise encounters

It is of interest to study how negative group interactions where each individual confronts against one another impact gun ownership rates. Assume the frequency of  $A$  individuals in a population is  $x$  and the frequency of  $B$  individuals is  $1 - x$ . We consider unbiased group

formation: a group of size  $m$  is formed by binomial sampling from the perspective of a focal individual. Therefore, the probability of having  $k$  A's among the  $m - 1$  group members excluding the focal individual is given by:

$$\binom{m-1}{k} x^k (1-x)^{m-1-k}.$$

For a group size  $m$ , the payoffs associated with  $A$  (armed) and  $B$  (disarmed) depend in the number of  $A$ 's, denoted by  $k$ , in the group. Specifically, we assume the expected average escalation payoff for an  $A$  individual due to a shootout linearly depend on the fraction of  $A$  as  $-\delta_s(k-1)/m$  while the average intimation payoff for  $A$  obtained from  $B$  individuals is shared with all  $A$ 's,  $\delta_e/k$  for  $k \geq 1$ . On the other hand, a  $B$  individual in a group having  $k$   $A$ 's has a concession cost as  $\delta_e$  only  $k \geq 1$ ; otherwise it is zero. In addition, the average payoff for a  $B$  individuals in unarmed confrontations is  $-\delta_n * (m - k - 1)/m$ . This means for an individual,  $A$  or  $B$ , centered group consisting of  $k$  many other  $A$ 's:

$$\begin{aligned} g_{1,k} &= -\delta_s k / (m-1) + \delta_e / (k+1) * (m-1-k) / (m-1), \\ g_{0,k} &= -\text{sign}(k) \delta_e / (m-1) - \delta_n * (m-k-1) / (m-1), \end{aligned}$$

Averaging all possible group compositions, we obtain the average payoff for an  $A$  individual

$$g_1(x) = b_g - c_g + p_a \sum_{k=0}^{m-1} \binom{m-1}{k} x^k (1-x)^{m-1-k} g_{1,k} = b_g - c_g + p_a \frac{-\delta_s(m-1)x^2 + \delta_e[(1-x) - (1-x)^m]}{(m-1)x}$$

and the average payoff for a  $B$  individual

$$g_0(x) = p_a \sum_{k=0}^{m-1} \binom{m-1}{k} x^k (1-x)^{m-1-k} g_{0,k} = p_a [-\delta_e \frac{1-x-(1-x)^m}{(m-1)(1-x)} - \delta_n(1-x)]$$

The ESS  $x^* \in (0, 1)$  can be solved numerically by letting  $g_1(x) = g_0(x)$ . As shown in Fig. ??,  $x^*$  exhibits similar transition from zero to non-zero acquisition once the provocation rate  $p_a$  exceeds a critical threshold.

In particular, for  $m = 2$ , the model reverts to our original model with pairwise encounters:

$$\begin{cases} g_1(x) &= b_g - c_g + p_a(-\delta_s x + \delta_e(1-x)), \\ g_0(x) &= p_a(-\delta_e x - \delta_n(1-x)). \end{cases}$$

For  $m > 2$ , the model shows the impact of group size on equilibrium gun ownership rate. Because of the antagonistic nature of gun interactions, gun acquisition rate is lower in larger groups (Fig. S8). The presence of more guns does not render higher advantage over unarmed individuals but instead they neutralize at each other and diminish the potential advantage in confrontations.

Interestingly, the critical  $p_a$  above which non-zero gun acquisition arises remain the same, regardless of the group size  $m$ , given by letting  $g_1(x) = g_0(x)$  and solving for  $p_a$

$$\begin{aligned} p_a^* &= \lim_{x \rightarrow 0} \frac{(b_g - c_g)(m-1)x(x-1)}{\delta_e(1-x-(1-x)^m) + \delta_n(m-1)x + (2\delta_n + \delta_s)(1-m)x^2 + (m-1)(\delta_s + \delta_n)x^3} \\ &= \frac{c_g - b_g}{\delta_e + \delta_n}. \end{aligned} \tag{20}$$



This independence of  $p_a^*$  on  $m$  is also confirmed in Fig. S8.

### 3.3 Threat perception coevolving with gun acquisitions

In our base model, we use the provocation rate  $p_a$  to prescribe the extent of social environment deterioration and how it impacts individuals' decisions to own guns. More realistically, this parameter  $p_a$  can be interdependent with the population-level gun ownership rate  $x$  at any given time and thus dynamically coevolve with it. Therefore, we consider an extended model where  $p_a(t)$  represents individuals' threat perception – an individual's belief about the likelihood of encountering confrontations involving guns – as follows:

$$\dot{x} = x(1-x)(b_g - c_g + p_a(\delta_e + \delta_n - (\delta_n + \delta_s)x)), \quad (21)$$

$$\dot{p}_a = p_a(1-p_a)(\theta x - (1-x)). \quad (22)$$

The parameter  $\theta > 0$  represents how strongly individuals perceive increased threat due to others' gun acquisitions  $x$  which is also counteracted by the fraction of the population choosing not to arm themselves,  $1-x$ . Thus, the term  $\theta x - (1-x)$  regulates how threat perception coevolves with gun acquisitions  $x$ .

On the other hand, the perceived threat  $p_a$  impacts individuals' deliberations of payoffs, we have  $g_1(x) = b_g - c_g + p_a(-\delta_n x + \delta_e(1-x))$ , and  $g_0(x) = p_a(-\delta_e x - \delta_n(1-x))$ . Substituting these payoffs into the replicator equation, we obtain the system of ordinary differential equations above.

Table S1 lists all possible equilibria (fixed points) of the co-evolving system  $(x^*, p_a^*)$ . The eigenvalues of the Jacobian matrix at each fixed point provide insights into their stability. Aside from the boundary equilibria, we are mainly interested in the condition for the existence of an interior fixed point for  $0 < x^* < 1$  and  $0 < p_a^* < 1$ , requiring

$$0 < \frac{1}{1+\theta} < 1, \quad (23)$$

$$0 < \frac{(c_g - b_g)(1+\theta)}{\delta_e - \delta_s + \theta(\delta_e + \delta_n)} < 1. \quad (24)$$

The first inequality is satisfied for any  $\theta > 0$ . Therefore, for the second inequality to hold, the payoff structure must satisfy certain conditions as given above. Whether for the negative solo payoff of owning a gun ( $b_g - c_g < 0$ , which is the focus of the main text) or the opposite case ( $b_g - c_g > 0$ ), this interior fixed point can exist.

The stability of these fixed points is worth noting. All boundary equilibria are either a stable node (when both eigenvalues of the Jacobian matrix are negative) or an unstable node (when both eigenvalues are positive) or a saddle point (when the eigenvalues have opposite signs). Interestingly, the only admissible interior fixed point  $(\frac{1}{1+\theta}, \frac{(c_g - b_g)(1+\theta)}{\delta_e - \delta_s + \theta(\delta_e + \delta_n)})$ , when it exists, is either an unstable saddle point or a stable spiral. To be specific, the trace and determinant of the Jacobian matrix  $J$  associated with this fixed point are given by:

$$\text{Tr}(J) = \frac{(b_g - c_g)(\delta_n + \delta_s)\theta}{(1+\theta)(\delta_e - \delta_s + (\delta_e + \delta_n)\theta)}, \quad (25)$$

$$\text{Det}(J) = \frac{(b_g - c_g)(b_g - c_g + \delta_e - \delta_s + (b_g - c_g + \delta_e + \delta_n)\theta)\theta}{(\delta_e - \delta_s + (\delta_e + \delta_n)\theta)(1+\theta)}. \quad (26)$$

Typically, confrontations involving guns are far more detrimental than those without, meaning  $\delta_s \gg \delta_e, \delta_n$ . As such,  $b_g > c_g$  for the solo payoff of owning a gun needs to hold to ensure  $\text{Tr}(J) < 0$ . Indeed, this condition is particularly relevant in the context of American gun culture. Our modeling analysis suggests that gun acquisition and risk perception together can manifest oscillatory behavior, even without accounting for external disruptions such as social unrest.

Therefore, when  $(\text{Tr}(J))^2 - 4\text{Det}(J) < 0$  the fixed point is a stable spiral, indicating the system can exhibit damped oscillatory behavior. When  $\text{Det}(J) < 0$  and  $(\text{Tr}(J))^2 - 4\text{Det}(J) > 0$ , the fixed point is a saddle point. However, it is impossible for  $\text{Det}(J) > 0$  (the product of the two eigenvalues being positive) while  $\text{Tr}(J) < 0$  (their sum being negative) under the payoff structure requiring  $\delta_s \gg \delta_e, \delta_n$  and  $b_g > c_g$ .

In the main text, Fig. 5 presents the system dynamics through streamplots in the phase plane of  $(x, p_a)$ , along with the admissible boundary and interior equilibria, by comparing scenarios where  $b_g < c_g$  (Fig. 5a and 5b) to those where  $b_g > c_g$  (Fig. 5c and 5d). In line with the main case discussed in the main text ( $b_g < c_g$ , where the solo payoff for owning a gun is negative), a small feedback effect of the corresponding perceived threat in response to others' gun acquisition (small  $\theta$ ) results in a single stable equilibrium at  $(0, 0)$ . This suggests that the population ultimately converges to complete disarmament, leading to zero perceived risk. In contrast, as the feedback effect increases significantly (large  $\theta$ ), an interior equilibrium  $(\frac{1}{1+\theta}, \frac{(c_g-b_g)(1+\theta)}{\delta_e-\delta_s+\theta(\delta_e+\delta_n)})$  emerges, which is a saddle point. In this regime, the system exhibits bistable dynamics: depending on the initial conditions, the population can converge to either the disarmed state  $(0, 0)$  or the state of high gun acquisition rate  $(\frac{b_g-c_g+\delta_e+\delta_n}{\delta_n+\delta_s}, 1)$ . The respective basins of attraction for these two stable equilibria can be seen in Fig. 5b.

In the complementary case where  $b_g > c_g$  (solo payoff for owning a gun is positive), the population shows a natural preference for gun ownership in the first place. This scenario may align with cultural contexts such as American gun culture, where gun ownership is often, though not universally, perceived positively when social payoffs are not considered. In this case with  $\delta_s \gg \delta_e, \delta_n$ , the same interior point  $(\frac{1}{1+\theta}, \frac{(c_g-b_g)(1+\theta)}{\delta_e-\delta_s+\theta(\delta_e+\delta_n)})$  becomes a stable spiral under certain payoff structure conditions. Notably, the population show oscillatory dynamics in gun acquisition and risk perception. As gun acquisition rises in response to perceived risk (which is elevated by others' gun acquisition), the exceedingly high prevalence of guns subsequently diminishes the perceived relative advantage of ownership. This feedback loop can further lead to lower gun acquisition and reduced risk perception, creating oscillations even in the absence of external disturbances such as social unrest. These dynamics highlight the antagonistic nature of gun interactions and the oscillating "tragedy of the commons" driven by self-fulfilling cycles of gun acquisition and threat perception.

Finally increasing the cost of concession  $\delta_e$  to a level comparable to  $\delta_s$  causes the interior equilibrium to disappear while the boundary equilibrium becomes stable. In this example shown in Fig. 5d, the population ends up with heightened risk perception with high gun acquisition. Varying  $\delta_e$  has a similar impact as in the base model studied in the main text (Fig. 1b): the fear of being disadvantaged can drive a self-reinforcing cycle between overarming and persistent perceive risks.

Table S1: List of all possible fixed points and the eigenvalues of the Jacobian matrix  $J$  for the corresponding fixed points. We use \*\* only in cases where the closed-form expressions for eigenvalues  $\lambda_{1,2}$  are too lengthy to include. The eigenvalues for a  $2 \times 2$  Jacobian matrix  $J$  are given by  $\lambda_{1,2} = \frac{1}{2}(\text{Tr}(J) \pm \sqrt{(\text{Tr}(J))^2 - 4\text{Det}(J)})$ .

| Fixed points $(x^*, p_a^*)$                                                                             | Eigenvalues                                                                                                                                                                                              |
|---------------------------------------------------------------------------------------------------------|----------------------------------------------------------------------------------------------------------------------------------------------------------------------------------------------------------|
| $(0, 0)$                                                                                                | $-1, b_g - c_g$                                                                                                                                                                                          |
| $(1, 0)$                                                                                                | $-b_g + c_g, \theta$                                                                                                                                                                                     |
| $(0, 1)$                                                                                                | $1, b_g - c_g + \delta_e + \delta_n$                                                                                                                                                                     |
| $(1, 1)$                                                                                                | $-b_g + c_g - \delta_e + \delta_s, -\theta$                                                                                                                                                              |
| $(\frac{b_g - c_g + \delta_e + \delta_n}{\delta_n + \delta_s}, 1)$                                      | $\frac{(b_g - c_g + \delta_e + \delta_n)(b_g - c_g + \delta_e - \delta_s)}{\delta_n + \delta_s}, -\frac{b_g - c_g + \delta_e - \delta_s + \theta(b_g - c_g + \delta_e + \delta_n)}{\delta_n + \delta_s}$ |
| $(\frac{1}{1+\theta}, \frac{(c_g - b_g)(1+\theta)}{\delta_e - \delta_s + \theta(\delta_e + \delta_n)})$ | **                                                                                                                                                                                                       |

## 4 Model-based insights into gun purchases in the United States since 2000

The extended coevolutionary model of gun acquisition and threat perception incorporates subtle psychological dynamics in a feedback manner: perceived provocation can be influenced by others' gun acquisition, which, in turn, can trigger further threat response, such as purchasing more guns, due to elevated perceived risks. A theoretical model of this sort, while not taking into account external social and political events, provides plausible mechanistic insights into the self-reinforcing cycles of self-serving gun acquisition and risk perception, particularly in the context of American gun culture.

To this end, as a reasonable and practical consideration, we use annual gun sales in the United States since 2000 as a proxy for threat responses driven by perceived risks. This approach does not account for the seasonality of gun purchases, which exhibit cyclic patterns throughout the year. However, it still effectively captures changes in perceived risk and the overall trend from year to year.

Our data source is retrieved from url <https://www.thetrace.org/2020/08/gun-sales-estimates/> which is derived from FBI's National Instant Criminal Background Check System (NICS). Because the values of perceived risk  $p_a$  and gun acquisition  $x$  are restricted to  $[0, 1]$  without loss of generality, we use the normalized original data (plotted as dots in Fig. S9). We then fit our model and obtain the best estimates for the model parameters using the simulated annealing method (Table S2). The inferred model parameters reveal a specific payoff structure satisfying  $b_g > c_g$  and  $\delta_s \gg \delta_e > \delta_n$ . Given these estimated payoff values, the population exhibits oscillatory dynamics, as predicted by our theoretical analysis in above Section 3.3 (Fig. 5c in the main text). The alignment between the data and the fitted model suggests that our extended model effectively captures the interplay between self-serving inclination to own a gun as a threat response and the dynamics of risk perception.

Despite the insights provided by our extended model, several limitations warrant discussion. First, the data on gun purchases, derived from background checks, is an inevitable underestimate of actual gun acquisition due to private sales, unreported transactions, and varying state regulations. This discrepancy highlights the need for more comprehensive data to fully capture gun acquisition trends.

Second, the model does not account for local variations in gun culture or differences between states, which are significant factors in shaping attitudes toward gun acquisition and perceived risk. For instance, states with strong traditions of hunting or permissive gun laws may exhibit dynamics distinct from those with stricter regulations or differing cultural attitudes.

Third, the model does not account for major external events, such as the 2008 financial crisis and the social unrest during the COVID-19 pandemic, both of which likely influenced gun sales and public perceptions of risk. Incorporating such contextual factors could further enhance the model’s explanatory and predictive power, particularly with regard to the goodness of fit during the 2020s. Nevertheless, the fact that the model captures the overall trend indicates it captures the essence of the interplay between gun acquisition and risk perception.

It is also important to note that this is a population-level model, which, while not capturing individual-level variability or decision-making, is highly useful in providing a broad understanding of the feedback dynamics at play. Future extensions of the model could incorporate additional factors such as social norms, legislative changes, media influence, and broader social behavioral dynamics of gun acquisition. Moreover, longitudinal studies examining attitudes and behaviors related to guns would be invaluable for refining and validating such models. These empirical studies could provide more granular data, enabling a deeper and more realistic exploration of gun acquisition and risk perception at both individual and community levels.

Table S2: Model parameter estimations based on real gun purchase data from 2000 to 2023. We present the best-fitted values of the model parameters relative to the cost of a shootout,  $\delta_s$ , which is fixed at one without loss of generality.

| Model parameters | Best estimates | 95% confidence intervals |
|------------------|----------------|--------------------------|
| $b_g$            | 0.8281         | [0.3038, 0.9952]         |
| $c_g$            | 0.6417         | [0.1182, 0.8080]         |
| $\delta_e$       | 0.0015         | [0.0010, 0.1000]         |
| $\delta_n$       | 0.0012         | [0.0010, 0.0027]         |
| $\delta_s$       | 1.0000         | [1.0000, 1.0000]         |
| $\theta$         | 0.9037         | [0.7311, 1.0000]         |

## 5 Empirical support for game-theoretic model parameters regarding gun ownership

In Table S3 below, we compile a list of U.S.-based studies and survey data that inform the operationalization of each parameter in our model, providing a brief summary of relevant qualitative and quantitative empirical findings. Doing so not only strengthens the empirical grounding of our theoretical work but also helps to conceive future empirical research.

To assess the plausibility of our theoretical assumptions and their relevance to real-world behavior, we fit our coevolutionary model to U.S. gun purchase data from 2000 to 2023. The best-fit model parameters (as given in Table S2 above) are qualitatively consistent with numbers observed in empirical studies and national survey reports (Table S3).

Specifically, the individual benefit of gun ownership ( $b_g \approx 0.83$ ) exceeds its cost ( $c_g \approx 0.64$ ), aligning with survey data indicating that most owners report a net sense of safety and utility from firearm possession. The social cost of shootouts is fixed at  $\delta_s = 1$ , allowing us to interpret the relative magnitudes of concession costs ( $\delta_e \approx 0.0015$ ) and unarmed disputes ( $\delta_n \approx 0.0012$ ). These low values reflect the common perception that the harm from yielding in an armed encounter or from verbal disputes is minimal relative to the potentially fatal consequences of gun violence. The inferred threat-sensitivity parameter ( $\theta \approx 0.90$ ) indicates that individuals in our model strongly adjust their perceived risk based on others' gun acquisitions – a finding supported by psychological studies on the contagious fear of being outgunned. Together, these values ground the model in empirically consistent assumptions, while highlighting how population dynamics and subjective perceptions can coevolve to produce collective overarming.

While our model is not directly validated with individual-level behavioral data, this form of empirical parameter estimation provides a first step toward testing the model's predictions against real-world dynamics. As such, our approach supports hypothesis generation for future interdisciplinary empirical studies, including behavioral experiments, and longitudinal analysis of firearm acquisition patterns in structured populations.

Table S3: Empirical justification for model parameters related to gun ownership and social aggression dynamics.

| Model parameter                                                                                                                                 | Qualitative and quantitative support from prior studies or survey reports                                                                                                                                                                                                                                                                                                                                                                                                                                                                                                                                                                                                                                                                                                                                                                                                                                                                                                                                                                                                                                                                                                                                                                                                                               |
|-------------------------------------------------------------------------------------------------------------------------------------------------|---------------------------------------------------------------------------------------------------------------------------------------------------------------------------------------------------------------------------------------------------------------------------------------------------------------------------------------------------------------------------------------------------------------------------------------------------------------------------------------------------------------------------------------------------------------------------------------------------------------------------------------------------------------------------------------------------------------------------------------------------------------------------------------------------------------------------------------------------------------------------------------------------------------------------------------------------------------------------------------------------------------------------------------------------------------------------------------------------------------------------------------------------------------------------------------------------------------------------------------------------------------------------------------------------------|
| $p_a$ : <b>Provocation rate/confrontation probability</b><br><i>Likelihood of gun-related interpersonal confrontations or perceived threat.</i> | <ul style="list-style-type: none"> <li>• <b>Prevalence of threat:</b> A 2017 Pew survey found 23% of U.S. adults say they or a family member have been threatened or intimidated with a gun<sup>1</sup>. This indicates a significant incidence of interpersonal gun threats.</li> <li>• <b>Perceived risk/fear:</b> Nearly 48% of Americans reported in 2019 that they worry at least somewhat about being the victim of a mass shooting<sup>2</sup>, reflecting a high perceived threat of violent confrontation. Similarly, fear of crime has driven many to arm themselves for protection<sup>3</sup>.</li> <li>• <b>Reported gun violence (confrontation) rates:</b> Justice Department statistics show the rate of nonfatal firearm violence is around 2 per 1,000 persons annually in recent years<sup>4</sup>. In other words, each year about 0.2% of Americans reported a robbery or assault where the offender has a gun. While not every citizen will face a gun confrontation, the number of gun-involved altercations is substantial; for example, over 160,000 injuries or deaths from firearm assaults occurred annually in the late 1980s<sup>5</sup>. These data underscore that confrontations involving guns, or the fear of them, are a real concern of the population.</li> </ul> |

---

**$b_g$ : Individual  
benefit of gun  
ownership**

*Personal gains  
(safety, utility, peace  
of mind, recreation)  
from owning a gun.*

- **Protection and safety:** Protection is the dominant motive for U.S. gun owners. In 2023, 72% of gun owners told Pew researchers that personal protection is a major reason they own a firearm<sup>6</sup>. Correspondingly, 81% of owners say they feel safer having a gun in the home<sup>6</sup>. This highlights the psychological benefit of security; owning a gun provides peace of mind and a sense of safety against crime.
- **Deterrence and empowerment:** Surveys indicate many owners believe a gun is a useful defensive tool. By 2021, 88% of gun owners (up from 67% in 2000) cited “protection against crime” as a reason for ownership<sup>3</sup>. The perceived benefit is that being armed equalizes power in threatening situations, deterring criminals and reducing fear of being victimized.
- **Recreation and other benefits:** Beyond self-defense, gun ownership confers recreational and intangible benefits. A majority of owners enjoy shooting as a hobby (71% say they enjoy owning a gun)<sup>6</sup>. National surveys show about 70% of owners use firearms for target shooting and 56% for hunting<sup>3</sup>. These survey results indicate guns provide sport and cultural value. These personal and social benefits (e.g., sport, collecting, tradition) contribute to the overall utility  $b_g$  for individuals who choose to own guns.

---

**$c_g$ : Individual cost  
of gun ownership**

*Personal risks and  
downsides (physical,  
financial,  
psychological) of  
owning a gun.*

- **Increased injury and death risk:** Extensive public-health research shows that keeping a gun is associated with higher risk of harm. A 2014 meta-analysis found individuals with firearm access have two times higher odds of being a homicide victim and three times higher odds of suicide than those without guns<sup>7</sup>. In short, a gun in the home substantially raises the likelihood of deadly outcomes, whether from violence, accidents, or self-harm<sup>8</sup>.
- **Accidents and unintentional harm:** Gun ownership also carries risk of unintentional shootings (especially with improper storage). In 2022, there were 463 unintentional firearm deaths in the U.S.<sup>8</sup>, and many more nonfatal accidental shootings (often involving children). An estimated 4.6 million children live in homes with a loaded, unlocked gun<sup>8</sup>, creating potential for tragic mishaps. These numbers illustrate the ever-present safety costs (injury, death, trauma) that come with owning firearms.
- **Mental and financial costs:** Owning a gun can impose psychological stress or financial burdens. Some gun owners acknowledge worrying about gun-related accidents or theft (though only 12% report worrying about having a gun at home<sup>6</sup>). Additionally, the monetary cost of purchasing firearms, ammunition, training, and secure storage can be significant. While harder to quantify, these factors contribute to  $c_g$ . Notably, for every case of defensive gun use, far more people report being threatened or harmed with guns<sup>9</sup>, implying that the net personal benefit of gun ownership is not without trade-offs in risk.



---

$\delta_s$ : **Social cost of  
shootout (armed  
confrontation)**

*Interpersonal and  
societal cost when  
both parties in a  
confrontation are  
armed (e.g., potential  
for shootouts and  
escalation).*

- **Escalation to lethal violence:** When two individuals are armed during a confrontation, the encounter is far more likely to escalate into a deadly exchange of gunfire. Research suggests that an armed person is actually at risk in such scenarios: In a case-control study in Philadelphia, those possessing a gun were 4.5 times more likely to be shot in an assault compared to those not carrying a gun<sup>10</sup>. In other words, a tense altercation can quickly turn into a bilateral shootout, greatly increasing the probability that someone (or both parties) gets seriously injured or killed.
- **Mutual risk and bystander harm:** Armed confrontations (two-gun scenarios) create crossfire that endangers not only the participants but also bystanders. For example, road rage incidents illustrate this social cost: by 2023, U.S. road rage shootings (often involving armed drivers on both sides) doubled from a few years prior, with someone shot or wounded in a road-rage encounter every 18 hours in 2023<sup>11</sup>. These incidents sometimes result in both shooter and victim being shot, or innocent third parties (passengers, nearby drivers) being hurt. Thus,  $\delta_s$  – the societal cost of two armed people clashing – includes the heightened chance of a firefight, potential injury to both combatants, and collateral damage to the public<sup>9</sup>. In essence, an armed society faces greater risks that routine disputes turn into lethal events.

---

$\delta_n$ : **Social cost of  
non-gun  
confrontation**

*Harm resulting from  
confrontations when  
no guns are involved  
(e.g., fistfights).*

- **Lower lethality of unarmed fights:** When conflicts occur without firearms, they are far less likely to be deadly. Disputes are often settled with verbal aggression or at worst fists/knives, leading to injury but seldom death. For instance, an analysis of Chicago assault data found that knife attacks outnumbered gun attacks 2.3 to 1, yet the fatality rate per 100 knife attacks was only about one-fifth that of gun attacks<sup>12</sup>. Even when focusing only on serious woundings, gun assaults were 2.5 times more likely to be fatal than knife assaults<sup>12</sup>. This illustrates that without guns, conflicts tend to cause less permanent harm – an attacker’s intent to kill often cannot be realized as easily with other weapons or physical force.
- **Typical outcomes of unarmed altercations:** Socially,  $\delta_n$  can include injuries from brawls or psychological trauma from threats, but the scope of harm is usually limited. A bar fight or a domestic dispute with no gun present might result in bruises, perhaps stabbings in extreme cases, but rarely the mass casualties or quick deaths that guns can inflict. Statistics show most aggravated assaults in the U.S. do not involve firearms, and those altercations largely end with the parties surviving (albeit sometimes with injuries)<sup>5</sup>. In sum, the cost of a non-gun confrontation, while not trivial (medical care, emotional distress, etc.), is considerably lower than when firearms are in play. Society bears fewer lasting consequences because unarmed or knife fights are less likely to produce fatalities or irreversible damage.

---

$\delta_e$ : **Concession cost  
of being unarmed  
vs. an armed  
opponent**

*Disadvantage or harm  
to a person who is  
unarmed when  
confronting someone  
with a gun (power  
asymmetry).*

- **Fear and power asymmetry:** The psychological toll of being unarmed against an armed threat is significant. The unarmed individual often has no choice but compliance or escape; any resistance could be met with lethal force. This fear of being helpless in the face of an armed attacker is a documented driver of gun ownership (e.g., 81% of U.S. gun owners say being armed makes them feel safer<sup>6</sup>. Qualitatively, victims describe the experience of facing a gun while unarmed as terrifying and disempowering. Even if no shots are fired, the armed person holds all the power in the situation. The cost  $\delta_e$  is thus measured in both tangible harm and intimidation: an unarmed person can be robbed, assaulted or controlled with near-impunity by an armed aggressor. As Pew research notes, about 1 in 4 Americans have felt this vulnerability – 23% have either personally or via family been at the receiving end of gun threats<sup>1</sup>. This starkly underscores the expected high cost (injury, loss, trauma) of being unarmed in a confrontation where the other party has a gun.
- **Victimization rates:** Empirical evidence shows that unarmed individuals frequently find themselves on the losing side of confrontations with armed aggressors. In national surveys, people report being threatened with a gun far more often than they report defending themselves with one. One study found Americans were three times more likely to have been threatened or harmed by a gun than to have used a gun in self-defense<sup>9</sup>. Likewise, analysis of crime surveys indicates nine times as many people are criminally victimized with a gun than are protected by a gun in any given year<sup>9</sup>. These figures highlight the severe power imbalance and high personal cost when an unarmed person faces an armed offender – the unarmed party is at a clear disadvantage and more likely to be injured, coerced, or killed.

---

**Sources:**

<sup>1</sup> Pew Research Center, *Guns in America: Attitudes and Experiences of Americans*, June 22, 2017. Available at: <https://www.pewresearch.org/social-trends/2017/06/22/americas-complex-relationship-with-guns/>.

- <sup>2</sup> Gallup, *Nearly Half in U.S. Fear Being the Victim of a Mass Shooting*, October 16, 2019. Available at: <https://news.gallup.com/poll/266681/nearly-half-fear-victim-mass-shooting.aspx>.
- <sup>3</sup> Gallup, *Gun Owners Increasingly Cite Crime as Reason for Ownership*, November 9, 2021. Available at: <https://news.gallup.com/poll/357329/gun-owners-increasingly-cite-crime-reason-ownership.aspx>.
- <sup>4</sup> Bureau of Justice Statistics, *Trends and Patterns in Firearm Violence, 1993–2023*, February 2024. Available at: <https://bjs.ojp.gov/library/publications/trends-and-patterns-firearm-violence-1993-2023>.
- <sup>5</sup> Bureau of Justice Statistics, *Firearms and Crimes of Violence: Selected Findings From National Statistical Series*, February 1994. Available at: <https://bjs.ojp.gov/content/pub/pdf/fcvssfns.pdf>.
- <sup>6</sup> Pew Research Center, *For Most U.S. Gun Owners, Protection Is the Main Reason They Own a Gun*, August 16, 2023. Available at: <https://www.pewresearch.org/politics/2023/08/16/for-most-u-s-gun-owners-protection-is-the-main-reason-they-own-a-gun/>.
- <sup>7</sup> Anglemeyer A., Horvath T., and Rutherford G., *The accessibility of firearms and risk for suicide and homicide victimization among household members: a systematic review and meta-analysis*, *Annals of Internal Medicine*, vol. 160, no. 2, pp. 101-110, 2014.
- <sup>8</sup> Center for Gun Violence Solutions, Johns Hopkins Bloomberg School of Public Health, *Firearm Violence in the United States*, 2023. Available at: <https://publichealth.jhu.edu/center-for-gun-violence-solutions/research-reports/gun-violence-in-the-united-states>.
- <sup>9</sup> Center for American Progress, *Debunking the ‘Guns Make Us Safer’ Myth*, June 25, 2015. Available at: <https://www.americanprogress.org/article/debunking-the-guns-make-us-safer-myth/>.
- <sup>10</sup> Branas C.C., Richmond T.S., Culhane D.P., Ten Have T.R., and Wiebe D.J., *Investigating the link between gun possession and gun assault*, *American Journal of Public Health*, vol. 99, no. 11, pp. 2034-2040, 2009.
- <sup>11</sup> Everytown Research & Policy, *Road Rage Shootings Remain Alarming High*, February 2024. Available at: <https://everytownresearch.org/road-rage-shootings-remain-alarmingly-high/>.
- <sup>12</sup> Office of Justice Programs, *Is Gun Control Likely to Reduce Violent Killings?*, National Criminal Justice Reference Service. Available at: <https://www.ojp.gov/ncjrs/virtual-library/abstracts/gun-control-likely-reduce-violent-killings>.

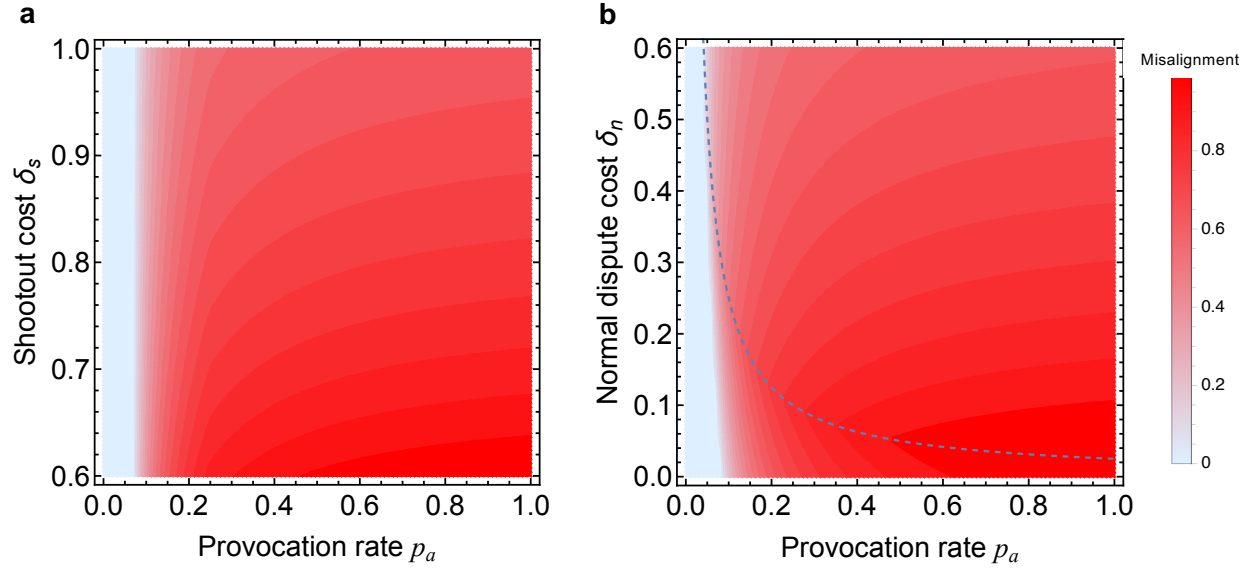

Fig. S1: Social dilemma of overarming impacted by the perceived cost of shootout,  $\delta_s$  and by the perceived cost of normal dispute,  $\delta_n$ . **(a)** Misalignment level is depicted as a heatmap over the parameter space  $(p_a, \delta_s)$ . **(b)** Similar heatmap as in **(a)** but over the parameter space  $(p_a, \delta_n)$ . The blue regions in **(a)** and **(b)** highlight the combinations of model parameters yielding zero gun acquisitions under individual self-interest, which also exactly aligns with social optimum. The dashed line in **(b)** marks the boundary below which the social optimum for gun acquisitions remains zero. In general, the levels of misalignment decrease as  $\delta_s$  and  $\delta_n$  increase, particularly when both optima are nonzero. Parameters:  $b_g = 0.1$ ,  $c_g = 0.15$ ; **(a)**:  $\delta_e = 0.6$ ,  $\delta_n = 0.1$ ; **(b)**:  $\delta_s = 1$ ,  $\delta_e = 0.6$ .

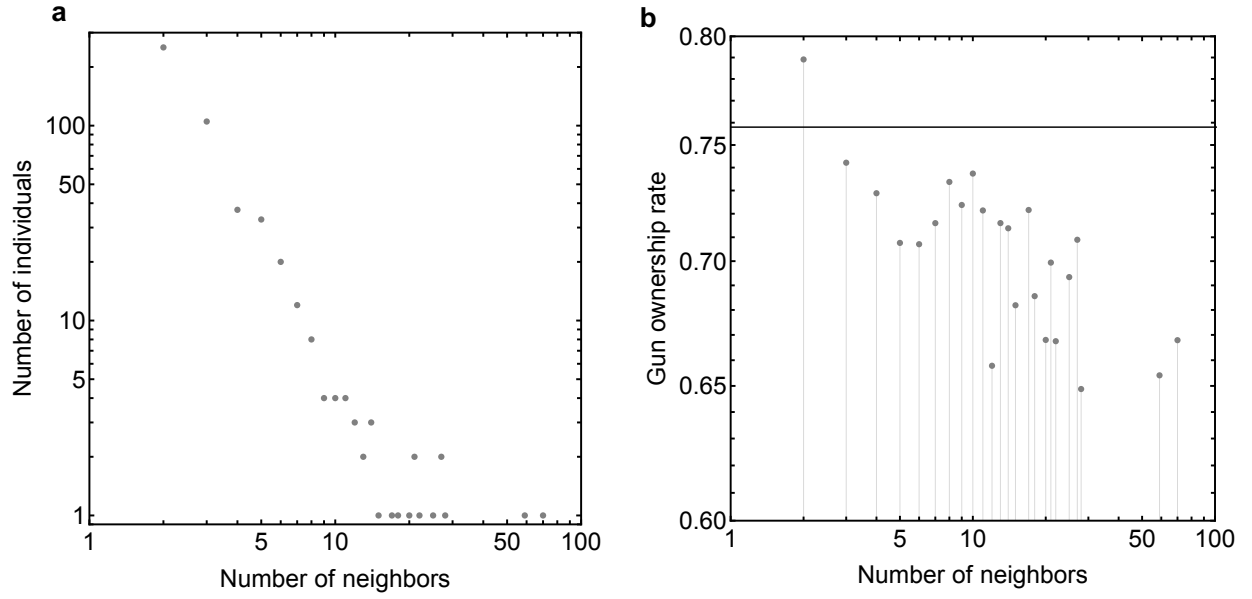

Fig. S2: The impact of degree on gun acquisitions in heterogeneous social networks. Individuals at the central nodes are less inclined to own guns compared to those at the periphery nodes who have fewer neighbors. **(a)** Degree distribution of a degree-heterogeneous model network. **(b)** A scatter plot illustrating the relationship between gun acquisitions and the number of an individual's neighbors. The horizontal line marks the network's average gun ownership rate at 75.8%. Parameters: network size 500, average degree 4,  $K = 0.1$ ,  $b_g = 0.1$ ,  $c_g = 0.15$ ,  $p_a = 0.5$ ,  $\delta_s = 1$ ,  $\delta_e = 0.6$ ,  $\delta_n = 0.1$ .

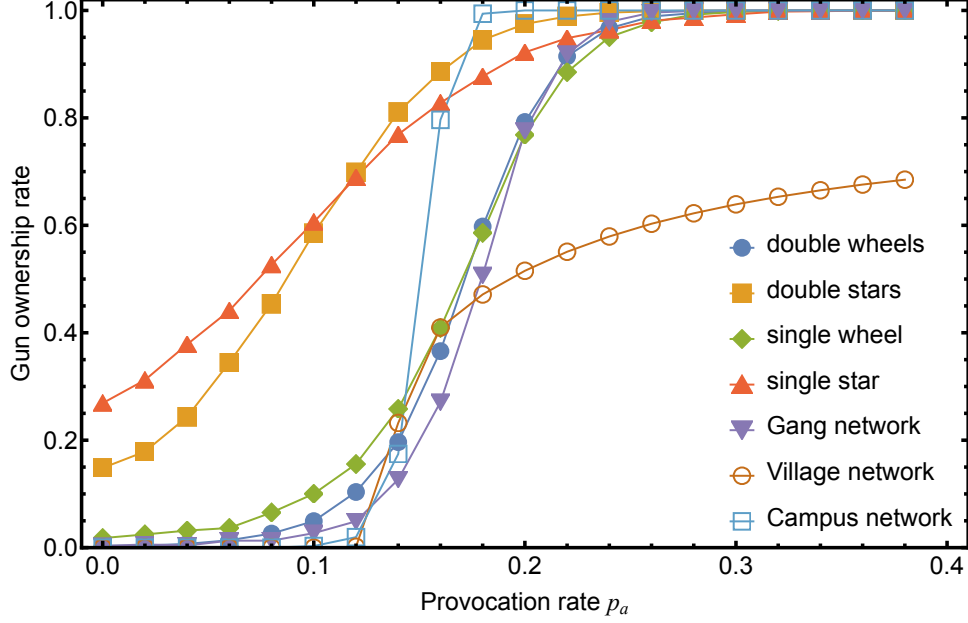

Fig. S3: The impact of network heterogeneity on gun acquisitions. The presence of star-like structure, together with clustering, can facilitate sharp transitions from zero to universal gun ownership. Comparative network snapshots reveal that the real gang and campus networks exhibit topological characteristics that bear resemblance to stylized structures like the single wheel and double wheels. In comparison, the star and double stars are even stronger amplifiers of gun acquisitions. Parameters:  $K = 0.1$ ,  $b_g = 0.1$ ,  $c_g = 0.15$ ,  $\delta_s = 1$ ,  $\delta_e = 0.6$ ,  $\delta_n = 0.1$ . The real networks are detailed as in the main text. For comparison, we examine stylized structures including the single star and wheel, double stars, and double wheels, all of which consist of 30 nodes each. Initial conditions are 50%  $A$ 's and 50%  $B$ 's, and results are averaged over 5000 independent runs using synchronous updating.

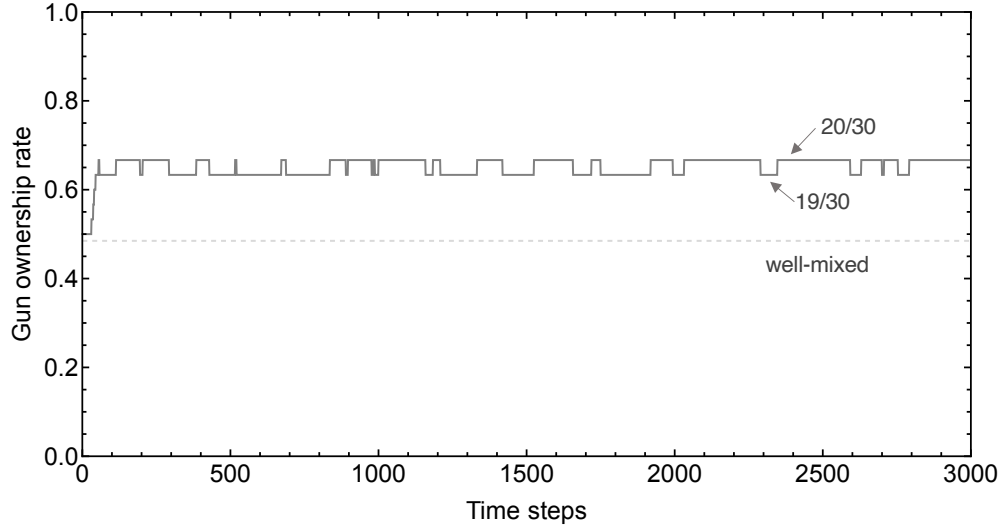

Fig. S4: Time series of gun acquisitions on a star graph. Starting from an equal mix of  $A$  and  $B$  individuals, the system enters into oscillatory dynamics (i.e., oscillating between 19/30 and 20/30) in which the leaf nodes are frozen in their strategic choices while the center alternates probabilistically between  $A$  (owning a gun) and  $B$  (not owning a gun). The dashed line is the individual self-interest equilibrium in well-mixed populations. Parameters:  $K = 1 \times 10^{-6}$ ,  $p_a = 0.3$ ,  $b_g = 0.1$ ,  $c_g = 0.15$ ,  $\delta_s = 1$ ,  $\delta_e = 0.6$ ,  $\delta_n = 0.1$ , star network size 30, initial conditions: 50%  $A$ 's and 50%  $B$ 's, and asynchronous updating.



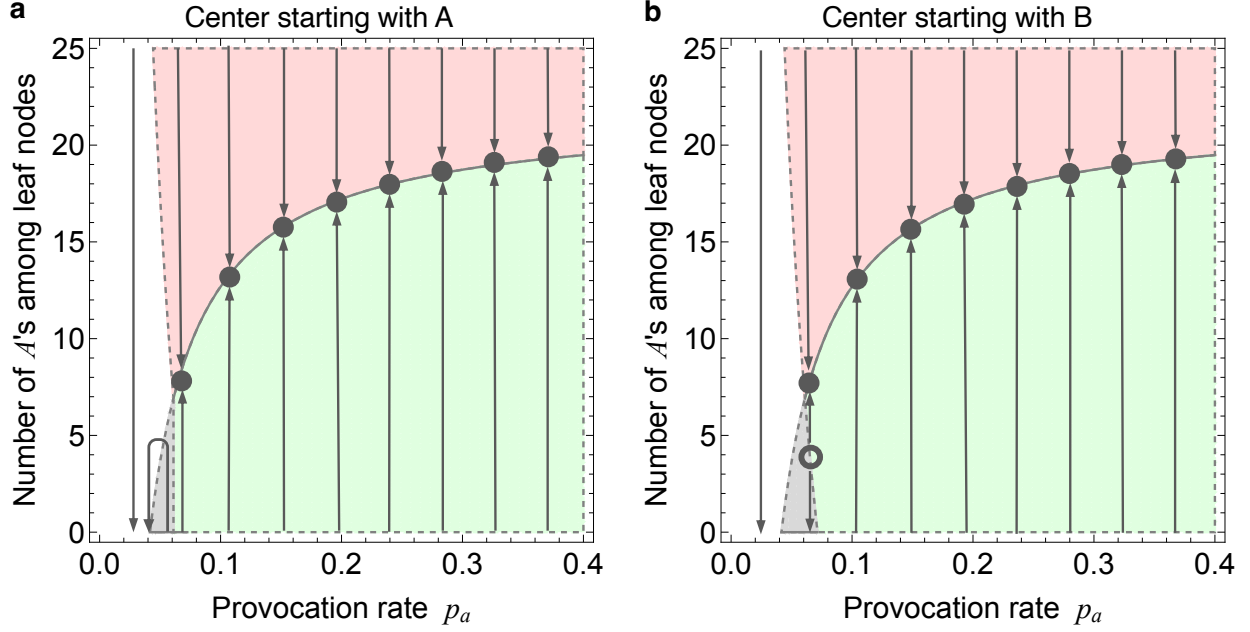

Fig. S5: Spread of gun acquisitions ( $A$  individuals) in star graphs. The spread dynamics depends on whether the center (hub) starts with  $A$ . **a**, Shown is the attraction of basin, when the center starts with  $A$ , as a function of the relative provocation rate,  $p_a$ , and the number of  $A$ 's in leaf nodes. The colors of the parameter regions suggest whether the number of  $A$ 's among leaf nodes can increase or not, indicated by the arrows. The green region indicates that a center  $A$  has a higher payoff than periphery  $B$ 's and that a center  $B$  has a lower payoff than periphery  $A$ 's. The red region indicates that a center  $A$  has a lower payoff than periphery  $B$ 's and that a center  $B$  has a lower payoff than periphery  $A$ 's. The most interesting region is the grey region in which the single center  $A$  first spreads to periphery nodes but once reaching a critical number of  $A$ 's, all  $A$ 's go extinct. Unless the critical number is an integer, the system will end up oscillatory dynamics (around the floor value of the filled circles) where the center alternates between  $A$  and  $B$  while the leaf nodes are frozen with their states. **b**, The phase diagram depicts similar dynamics as in **a**, except that the center starts with  $B$ . Moreover, there exists an interesting bistability behavior, as indicated by the empty circle in **b**. Parameters: we consider perfect rationality,  $K \rightarrow 0$ .  $b_g = 0.1$ ,  $c_g = 0.15$ ,  $\delta_s = 1$ ,  $\delta_e = 0.6$ ,  $\delta_n = 0.1$ , star network size 30.

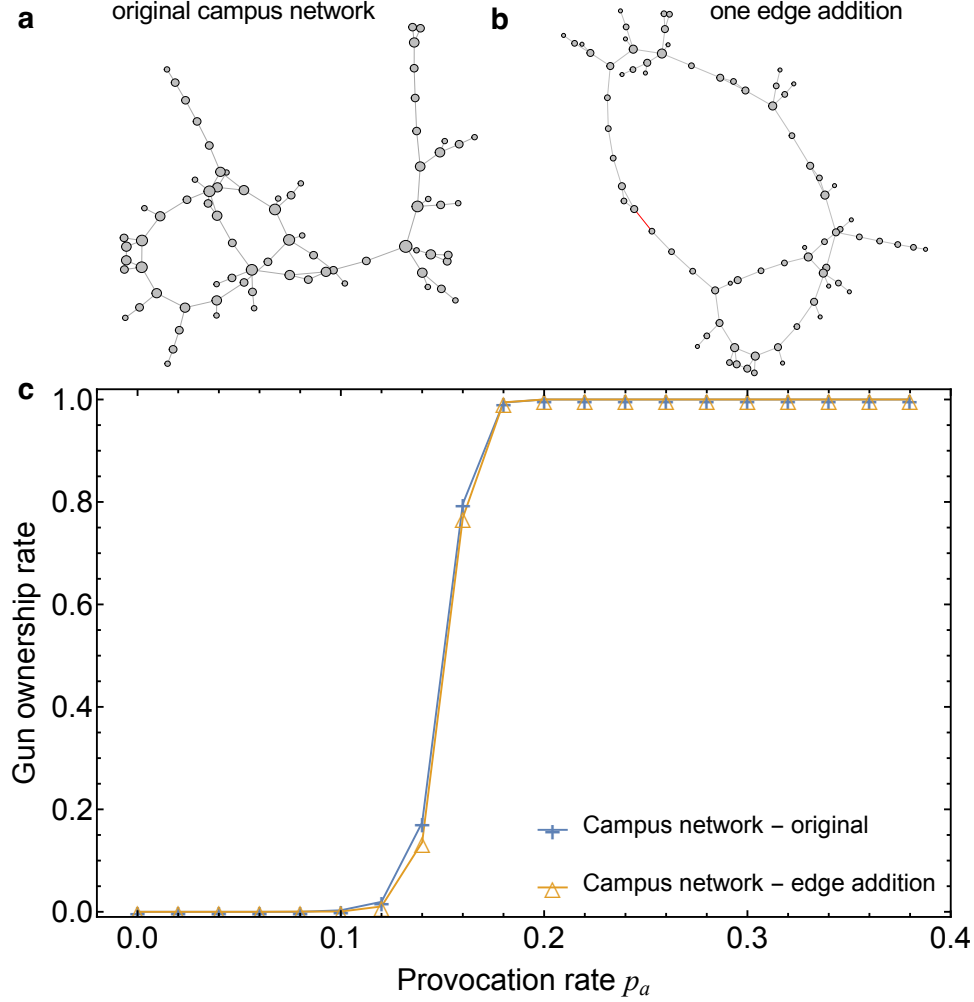

Fig. S6: Small changes in social network structure can have a big impact on gun acquisitions. Panels (a) and (b) show the original campus network in comparison to the where one edge is added between a pair of nodes having the largest path length. The added one edge connects two leaf nodes situated in two local star motifs. Panel (c) depicts the equilibrium gun acquisition rate as function of the provocation rate  $p_a$ , suggesting that the network with one edge added has higher critical  $p_a$  transitioning from zero to full acquisition rate with pronounced lower gun acquisition within the transition. This result indicates that small changes in the social network structure can have a disproportionately large impact on the gun acquisition. The parameters used are the same as in the main Fig. 3.

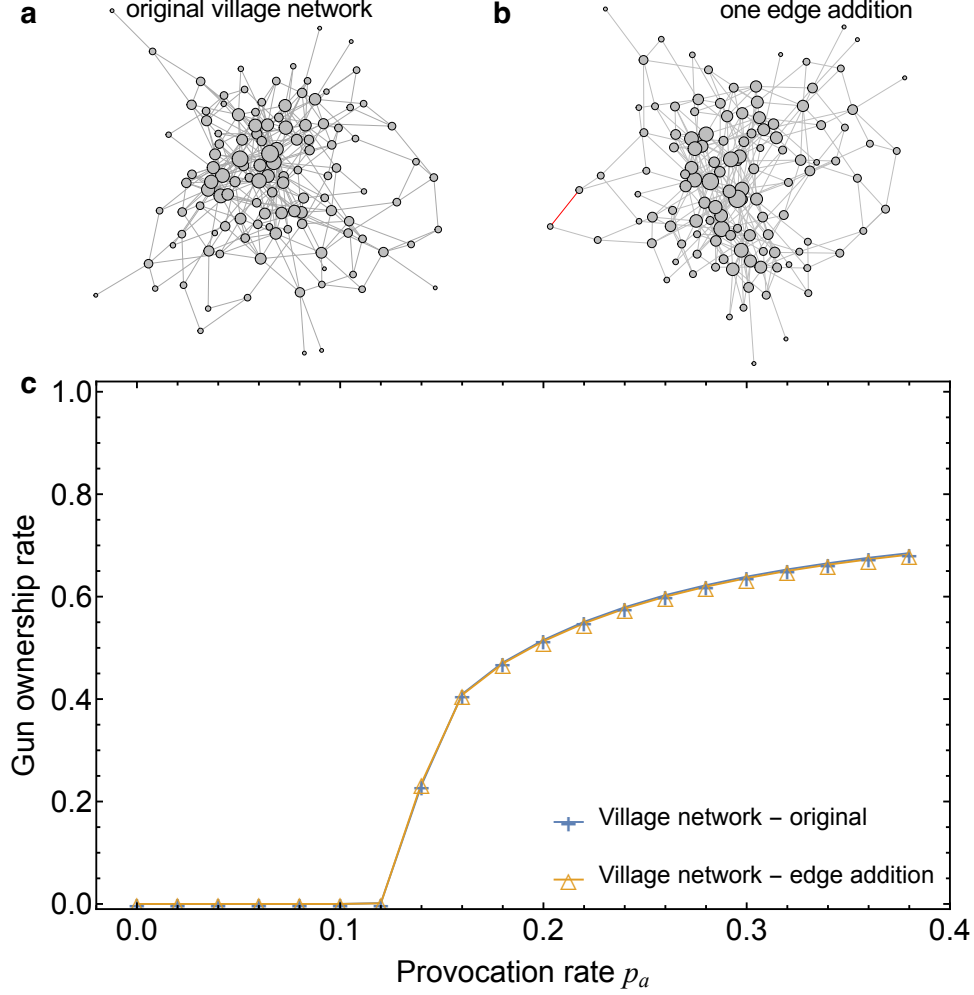

Fig. S7: Small changes in social network structure can have a significant impact on gun acquisitions. Panels (a) and (b) show the original village network in comparison to the where one edge is added between a pair of nodes having the largest path length. The added one edge connects two periphery nodes situated in two local star-like motifs. Panel (c) depicts the equilibrium gun acquisition rate as function of the provocation rate  $p_a$ , suggesting that the network with one edge added has a lower gun acquisition. This result indicates that small, targeted changes in the social network structure can have a noticeable impact on lowering gun acquisition. The parameters used are the same as in the main Fig. 3.

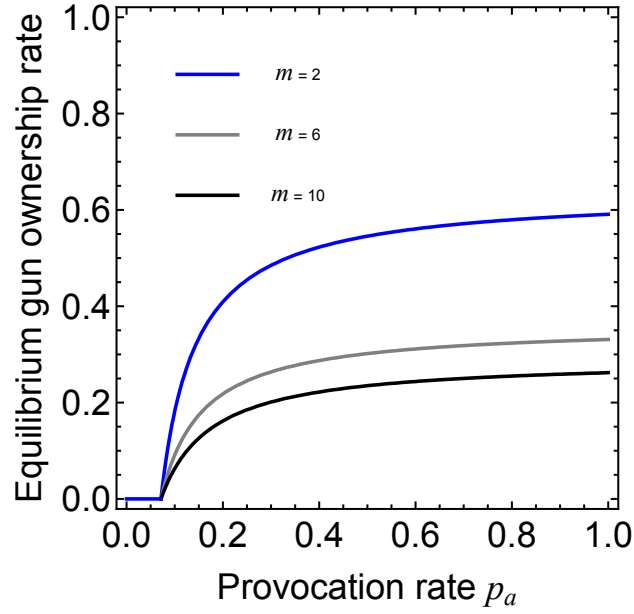

Fig. S8: Impact of group interactions on gun acquisition. Shown is the equilibrium gun ownership rate as a function of the provocation rate  $p_a$  for different group sizes  $m = 2, 6, 10$ . Increases in group size beyond two result in the presence of simultaneous multiple guns in the group and thus neutralize their advantage in group settings. Consequently, this leads to lower gun acquisition. Parameters are the same as in the main Fig. 1a, except for the group size  $m$  as indicated in the plot legend.

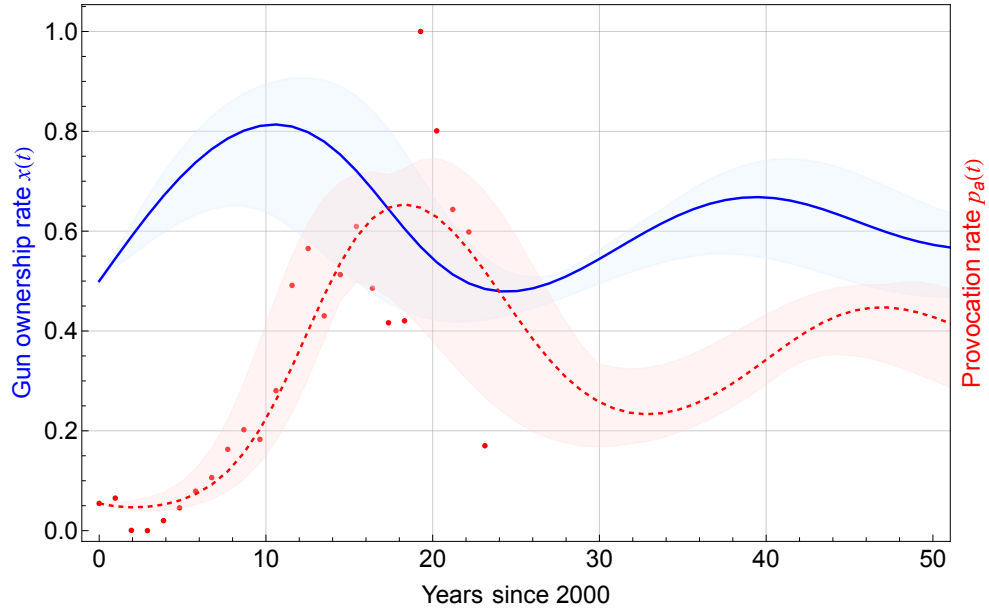

Fig. S9: Model-based insights into the feedback dynamics between perceived risk and gun ownership in the United States. We use gun sales as a proxy for the extent of perceived threat in our coevolutionary model of gun acquisition,  $x(t)$ , and threat perception,  $p_a(t)$ . The dots represent normalized annual gun sales, and the solid lines are best-fitted curves obtained from our model, with the corresponding shaded areas representing uncertainty quantified at the 95% confidence levels. Our model provides insights into the interplay between perceived threat and gun acquisition. See Table S2 for model parameter estimations.
